# Supplementary material for: High-Throughput Preparation and Machine Learning Screening of a Blue-Phase Liquid Crystal Based on Inkjet Printing
Source: MDPI journal article supplement (doi:10.3390/molecules27206938), 2022-10-16
Supplement: s1 [file s1]

## Electronic Supplementary Information

### High Throughput Preparation and Machine Learning Screening of Blue Phase Liquid Crystal Based on Inkjet Printing

WanLi He\*#, YongFeng Cui#, ShiGuang Luo#, WenTuo Hu, KaiNan Wang, Zhou Yang, Hui Cao, Dong Wang

#### 1. Standard curves of 5wt% R5011, 5wt% C6M, 40wt% BHR32100, 20wt% CB15 and 5wt% TMPTMA solutions in CMWYK channels

The preparation of standard curve is as follows: Taking 5wt% R5011 ink in cyan channel (C channel) as an example. 20 cyan circular patterns (8cm in diameter) with different chromaticity values were made based on CMYK mode by using image processing software (such as Photoshop), that is, the chromaticity values of 20 patterns with an interval of 5 were set in channel C: 5, 10, 15, 20, 25, 30,..., 100, while that of other channels were set to 0, as shown in **Figure S1**.

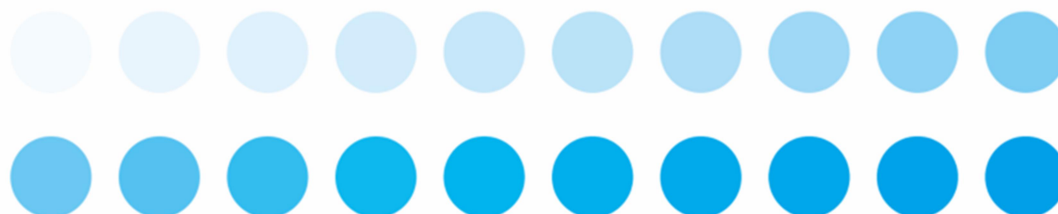

**Figure S1. Merged Patterns of Circles (8cm in Diameter) with Different Chroma Values**

At the same time, 20 pieces of square glass (size  $10 \times 10$  cm) were carefully cut from a large piece of glass and labeled by serial number, and then the weight of each glass was weighed and recorded for the first time. Then, these glasses were spliced together in order to be used as the printing substrate, and placed at the position corresponding to the above pattern arranged with 20 different chromaticity value circles. 5wt% R5011 cyclohexanone solution was added to the C channel, and then the combined patterns with different chromaticity values of C channel were sequentially inkjet printed on the substrate. The printed glasses were dried in a  $60\text{ }^{\circ}\text{C}$  blast oven for 3 hours, and then were weighed and recorded again when the solvent

volatilizes completely. When the chromaticity value is small ( $C < 45$ ), the deposition weight is thus too small to be accurately weighed. Therefore, the accurate deposition weight can be obtained by repeated printing for 3 times and then averaged. By dividing the weight difference of each glass before and after printing by the area of the each circle accordingly, the weight of R5011 deposited on the unit area of the substrate corresponding to 20 different chromaticity values could be obtained, as shown in **Table S1**. Then the relation curve between the chromaticity value in the range of 0 and 100 and the R5011 deposition weight can be fitted accordingly. Similarly, standard curves of cyclohexanone solutions of other components in other channels can be obtained according to the method, as shown in **Figure S2**.

**Table S1. Deposition weight of 5 wt% R5011 cyclohexanone solution for inkjet printing at different chromaticity values**

| C value | Glass weight before printing(g) | Glass weight after printing(g) | Deposition weight of R5011 (g) | Area of circle/mm <sup>2</sup> | Unit Deposition weight of R5011 (g) |
|---------|---------------------------------|--------------------------------|--------------------------------|--------------------------------|-------------------------------------|
| 5       | 10.71803833                     | 10.71805833                    | 2E-05                          | 5024                           | 3.98089E-09                         |
| 10      | 11.165245                       | 11.16533                       | 8.5E-05                        | 5024                           | 1.69188E-08                         |
| 15      | 10.77425333                     | 10.77439167                    | 0.000138333                    | 5024                           | 2.75345E-08                         |
| 20      | 10.88630833                     | 10.88667833                    | 0.00037                        | 5024                           | 7.36465E-08                         |
| 25      | 10.85176167                     | 10.85229833                    | 0.000536667                    | 5024                           | 1.06821E-07                         |
| 30      | 10.99565667                     | 10.99655667                    | 0.0009                         | 5024                           | 1.7914E-07                          |
| 35      | 10.88239                        | 10.88361167                    | 0.001221667                    | 5024                           | 2.43166E-07                         |
| 40      | 11.03692333                     | 11.03866167                    | 0.001738333                    | 5024                           | 3.46006E-07                         |
| 45      | 33.826025                       | 33.82822                       | 0.002195                       | 5024                           | 4.36903E-07                         |
| 50      | 33.96233                        | 33.965425                      | 0.003095                       | 5024                           | 6.16043E-07                         |
| 55      | 33.4477                         | 33.45155                       | 0.00385                        | 5024                           | 7.66322E-07                         |
| 60      | 33.02119                        | 33.02593                       | 0.00474                        | 5024                           | 9.43471E-07                         |
| 65      | 32.962445                       | 32.967875                      | 0.00543                        | 5024                           | 1.08081E-06                         |
| 70      | 32.69404                        | 32.70049                       | 0.00645                        | 5024                           | 1.28384E-06                         |
| 75      | 32.278465                       | 32.28595                       | 0.007485                       | 5024                           | 1.48985E-06                         |
| 80      | 32.615395                       | 32.624235                      | 0.00884                        | 5024                           | 1.75955E-06                         |
| 85      | 33.100795                       | 33.11078                       | 0.009985                       | 5024                           | 1.98746E-06                         |
| 90      | 32.644835                       | 32.65614                       | 0.011305                       | 5024                           | 2.2502E-06                          |
| 95      | 33.71531                        | 33.728325                      | 0.013015                       | 5024                           | 2.59057E-06                         |
| 100     | 33.122245                       | 33.136625                      | 0.01438                        | 5024                           | 2.86226E-06                         |

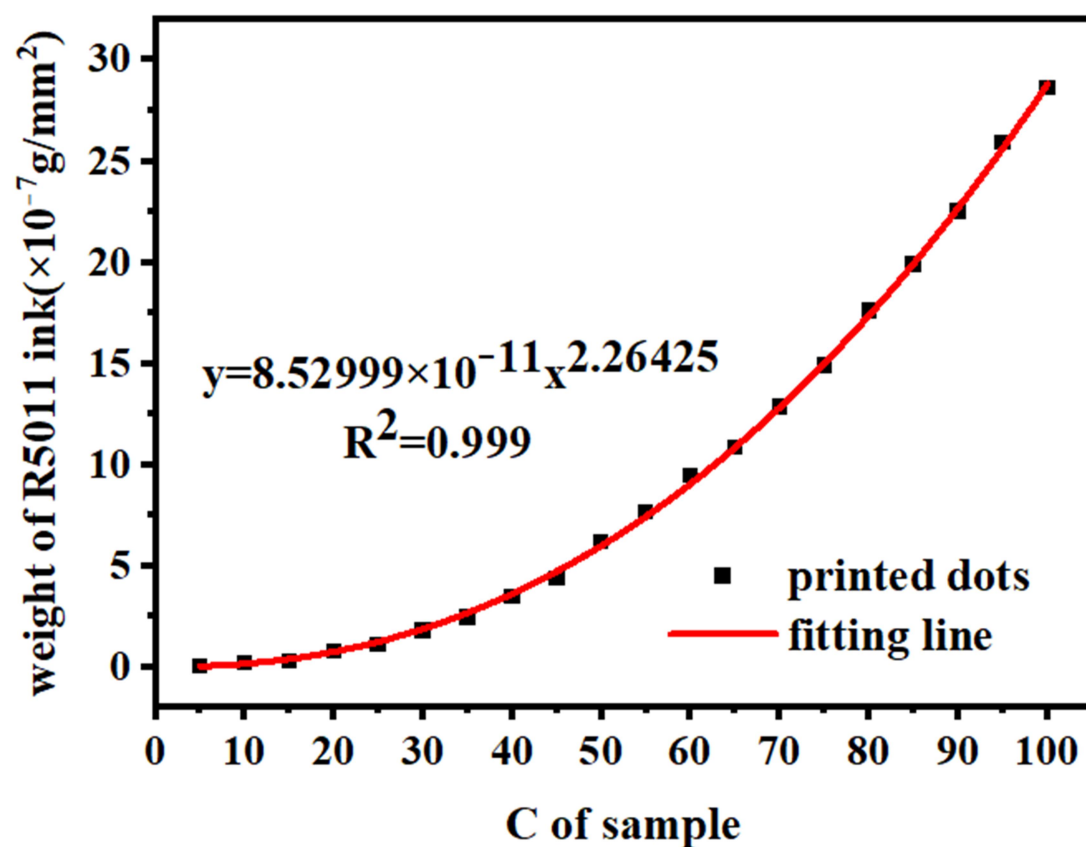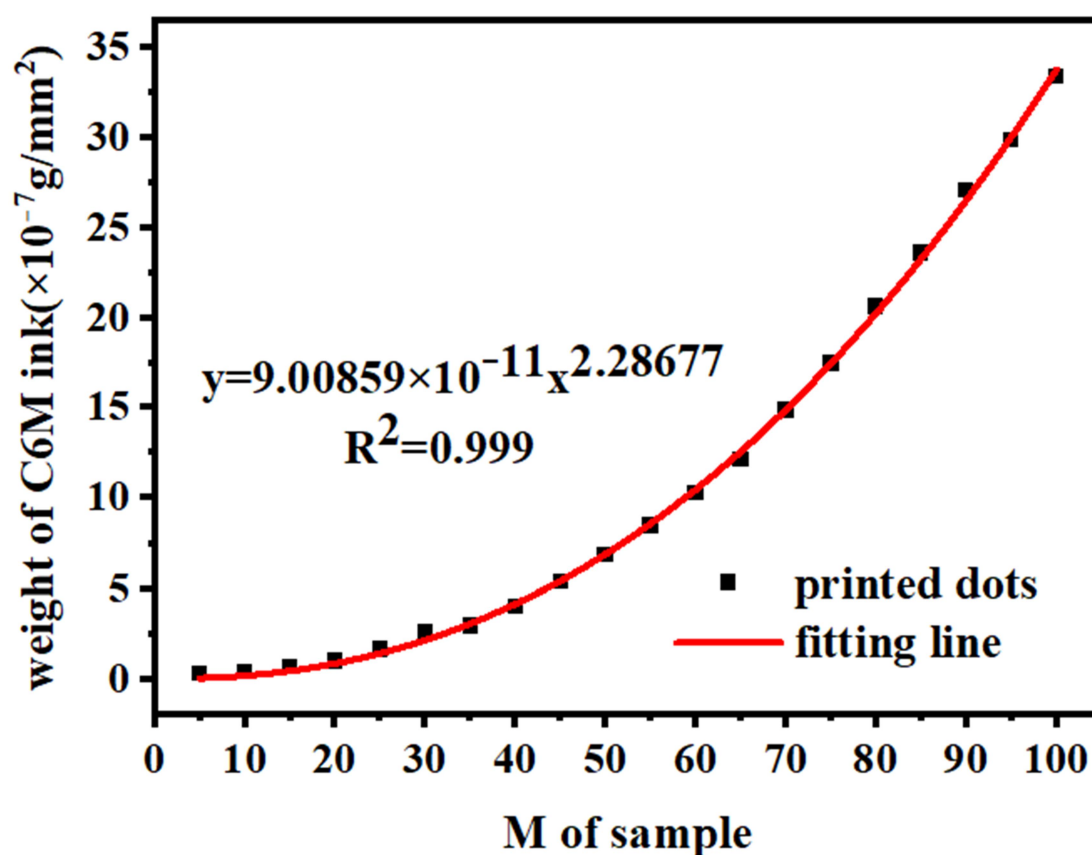

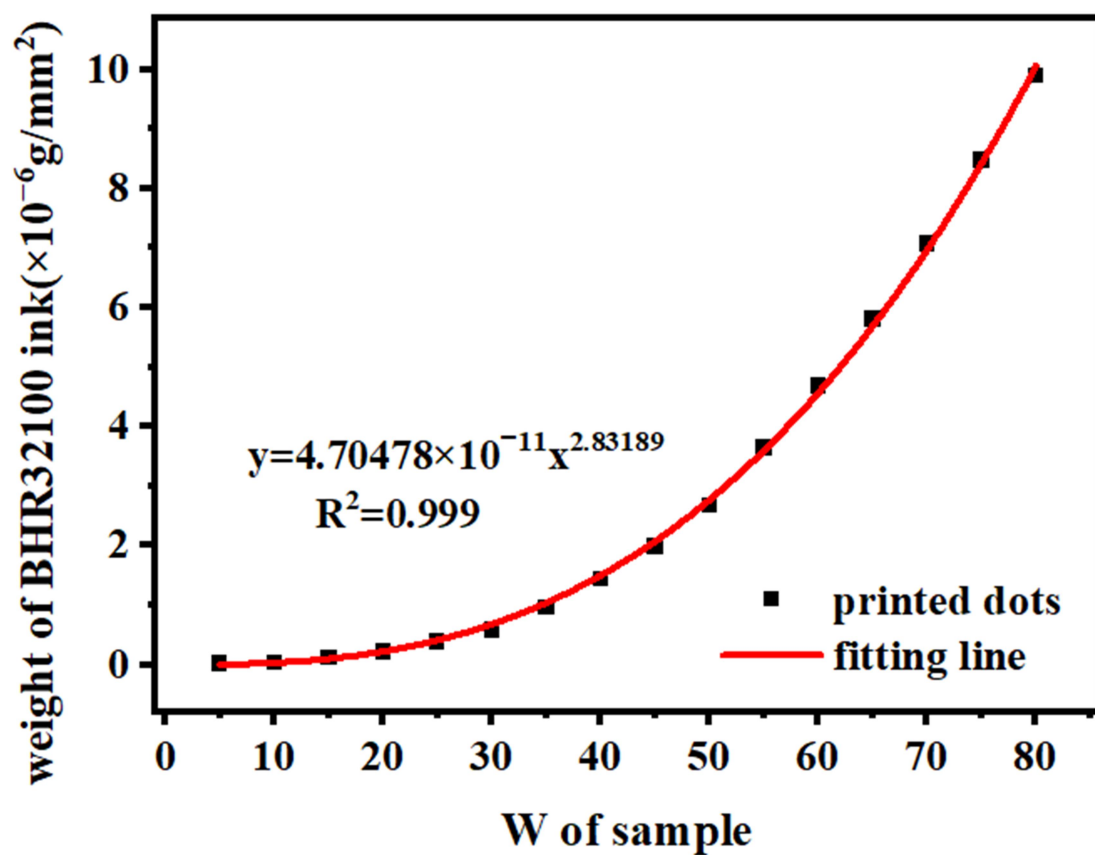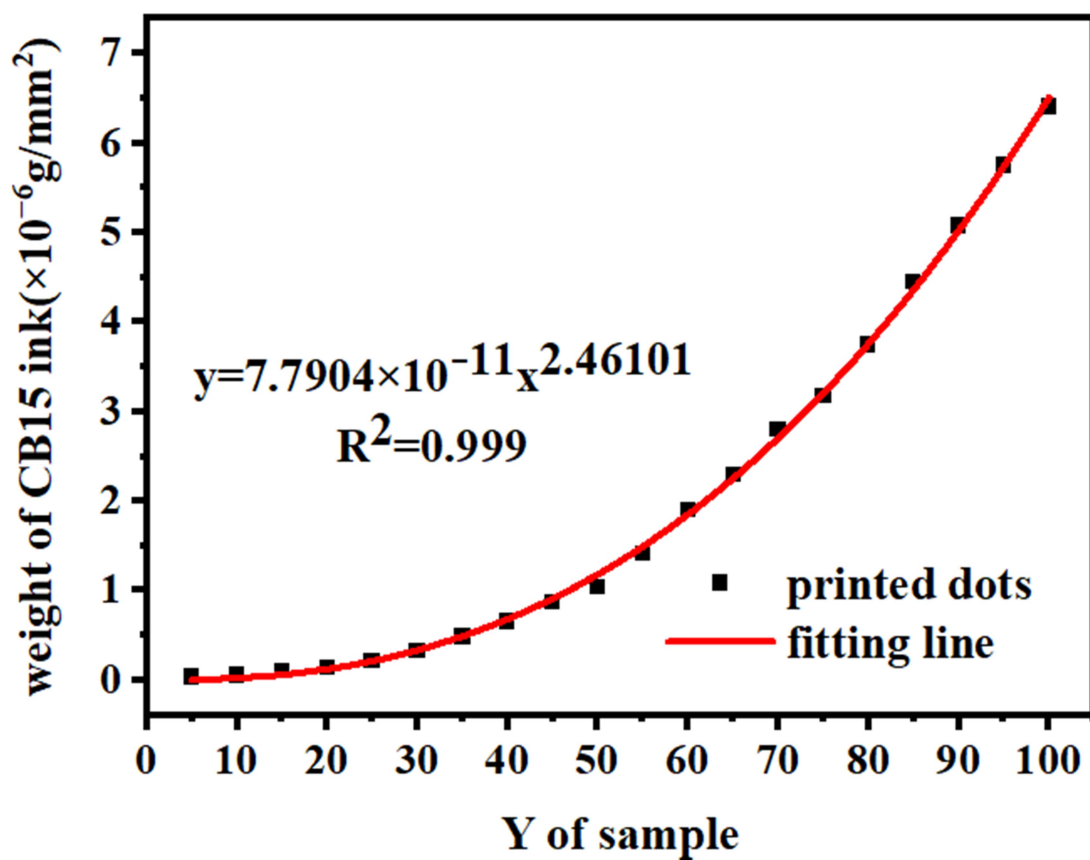

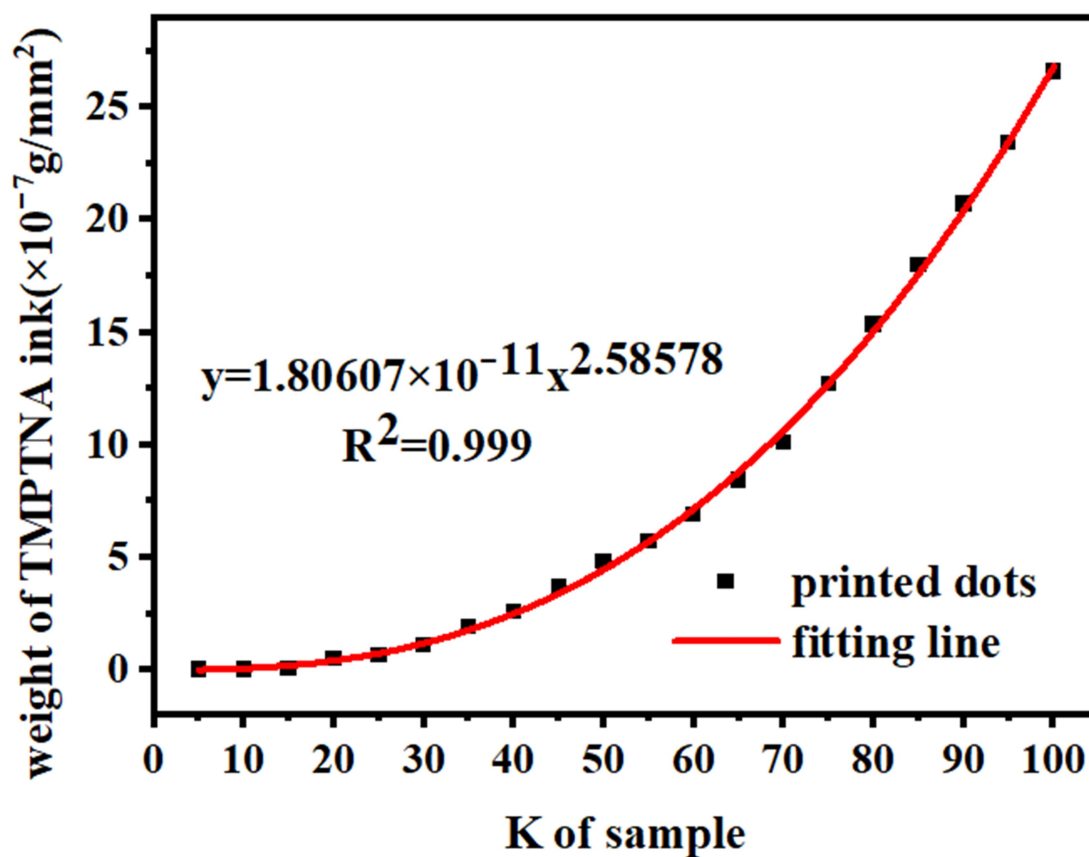

Figure S2. The standard curves corresponding to the cyclohexanone solution of 5wt% R5011, 5wt% C6M, 40wt% BHR32100, 20wt% CB1 and 5wt% TMPTMA are respectively inkjet printed in the CMWYK channel

Table S2 . Composition and proportion of liquid crystal samples for high-throughput ink-jet printing

| Sample No | TMPTMA (wt%) | CB15 (wt%) | C6M (wt%) | R5011 (wt%) | BHR32100 (wt%) |
|-----------|--------------|------------|-----------|-------------|----------------|
| 1         | 0            | 7          | 0         | 3.5         | 89.5           |
| 2         | 0            | 9.5        | 0         | 3.5         | 87             |
| 3         | 0            | 12         | 0         | 3.5         | 84.5           |
| 4         | 0            | 14.5       | 0         | 3.5         | 82             |
| 5         | 0            | 17         | 0         | 3.5         | 79.5           |
| 6         | 0            | 19.5       | 0         | 3.5         | 77             |
| 7         | 0            | 7          | 0         | 4           | 89             |
| 8         | 0            | 9.5        | 0         | 4           | 86.5           |
| 9         | 0            | 12         | 0         | 4           | 84             |
| 10        | 0            | 14.5       | 0         | 4           | 81.5           |

|    |   |      |     |     |      |
|----|---|------|-----|-----|------|
| 11 | 0 | 17   | 0   | 4   | 79   |
| 12 | 0 | 19.5 | 0   | 4   | 76.5 |
| 13 | 0 | 7    | 0   | 4.5 | 88.5 |
| 14 | 0 | 9.5  | 0   | 4.5 | 86   |
| 15 | 0 | 12   | 0   | 4.5 | 83.5 |
| 16 | 0 | 14.5 | 0   | 4.5 | 81   |
| 17 | 0 | 17   | 0   | 4.5 | 78.5 |
| 18 | 0 | 19.5 | 0   | 4.5 | 76   |
| 19 | 0 | 7    | 0   | 5   | 88   |
| 20 | 0 | 9.5  | 0   | 5   | 85.5 |
| 21 | 0 | 12   | 0   | 5   | 83   |
| 22 | 0 | 14.5 | 0   | 5   | 80.5 |
| 23 | 0 | 17   | 0   | 5   | 78   |
| 24 | 0 | 19.5 | 0   | 5   | 75.5 |
| 25 | 0 | 7    | 0   | 5.5 | 87.5 |
| 26 | 0 | 9.5  | 0   | 5.5 | 85   |
| 27 | 0 | 12   | 0   | 5.5 | 82.5 |
| 28 | 0 | 14.5 | 0   | 5.5 | 80   |
| 29 | 0 | 17   | 0   | 5.5 | 77.5 |
| 30 | 0 | 19.5 | 0   | 5.5 | 75   |
| 31 | 0 | 7    | 0   | 6   | 87   |
| 32 | 0 | 9.5  | 0   | 6   | 84.5 |
| 33 | 0 | 12   | 0   | 6   | 82   |
| 34 | 0 | 14.5 | 0   | 6   | 79.5 |
| 35 | 0 | 17   | 0   | 6   | 77   |
| 36 | 0 | 19.5 | 0   | 6   | 74.5 |
| 37 | 0 | 7    | 2.5 | 3.5 | 87   |
| 38 | 0 | 9.5  | 2.5 | 3.5 | 84.5 |
| 39 | 0 | 12   | 2.5 | 3.5 | 82   |
| 40 | 0 | 14.5 | 2.5 | 3.5 | 79.5 |
| 41 | 0 | 17   | 2.5 | 3.5 | 77   |
| 42 | 0 | 19.5 | 2.5 | 3.5 | 74.5 |
| 43 | 0 | 7    | 2.5 | 4   | 86.5 |
| 44 | 0 | 9.5  | 2.5 | 4   | 84   |
| 45 | 0 | 12   | 2.5 | 4   | 81.5 |
| 46 | 0 | 14.5 | 2.5 | 4   | 79   |
| 47 | 0 | 17   | 2.5 | 4   | 76.5 |
| 48 | 0 | 19.5 | 2.5 | 4   | 74   |
| 49 | 0 | 7    | 2.5 | 4.5 | 86   |
| 50 | 0 | 9.5  | 2.5 | 4.5 | 83.5 |
| 51 | 0 | 12   | 2.5 | 4.5 | 81   |
| 52 | 0 | 14.5 | 2.5 | 4.5 | 78.5 |
| 53 | 0 | 17   | 2.5 | 4.5 | 76   |
| 54 | 0 | 19.5 | 2.5 | 4.5 | 73.5 |

|    |   |      |     |     |      |
|----|---|------|-----|-----|------|
| 55 | 0 | 7    | 2.5 | 5   | 85.5 |
| 56 | 0 | 9.5  | 2.5 | 5   | 83   |
| 57 | 0 | 12   | 2.5 | 5   | 80.5 |
| 58 | 0 | 14.5 | 2.5 | 5   | 78   |
| 59 | 0 | 17   | 2.5 | 5   | 75.5 |
| 60 | 0 | 19.5 | 2.5 | 5   | 73   |
| 61 | 0 | 7    | 2.5 | 5.5 | 85   |
| 62 | 0 | 9.5  | 2.5 | 5.5 | 82.5 |
| 63 | 0 | 12   | 2.5 | 5.5 | 80   |
| 64 | 0 | 14.5 | 2.5 | 5.5 | 77.5 |
| 65 | 0 | 17   | 2.5 | 5.5 | 75   |
| 66 | 0 | 19.5 | 2.5 | 5.5 | 72.5 |
| 67 | 0 | 7    | 2.5 | 6   | 84.5 |
| 68 | 0 | 9.5  | 2.5 | 6   | 82   |
| 69 | 0 | 12   | 2.5 | 6   | 79.5 |
| 70 | 0 | 14.5 | 2.5 | 6   | 77   |
| 71 | 0 | 17   | 2.5 | 6   | 74.5 |
| 72 | 0 | 19.5 | 2.5 | 6   | 72   |
| 73 | 0 | 7    | 5   | 3.5 | 84.5 |
| 74 | 0 | 9.5  | 5   | 3.5 | 82   |
| 75 | 0 | 12   | 5   | 3.5 | 79.5 |
| 76 | 0 | 14.5 | 5   | 3.5 | 77   |
| 77 | 0 | 17   | 5   | 3.5 | 74.5 |
| 78 | 0 | 19.5 | 5   | 3.5 | 72   |
| 79 | 0 | 7    | 5   | 4   | 84   |
| 80 | 0 | 9.5  | 5   | 4   | 81.5 |
| 81 | 0 | 12   | 5   | 4   | 79   |
| 82 | 0 | 14.5 | 5   | 4   | 76.5 |
| 83 | 0 | 17   | 5   | 4   | 74   |
| 84 | 0 | 19.5 | 5   | 4   | 71.5 |
| 85 | 0 | 7    | 5   | 4.5 | 83.5 |
| 86 | 0 | 9.5  | 5   | 4.5 | 81   |
| 87 | 0 | 12   | 5   | 4.5 | 78.5 |
| 88 | 0 | 14.5 | 5   | 4.5 | 76   |
| 89 | 0 | 17   | 5   | 4.5 | 73.5 |
| 90 | 0 | 19.5 | 5   | 4.5 | 71   |
| 91 | 0 | 7    | 5   | 5   | 83   |
| 92 | 0 | 9.5  | 5   | 5   | 80.5 |
| 93 | 0 | 12   | 5   | 5   | 78   |
| 94 | 0 | 14.5 | 5   | 5   | 75.5 |
| 95 | 0 | 17   | 5   | 5   | 73   |
| 96 | 0 | 19.5 | 5   | 5   | 70.5 |
| 97 | 0 | 7    | 5   | 5.5 | 82.5 |
| 98 | 0 | 9.5  | 5   | 5.5 | 80   |

|     |   |      |     |     |      |
|-----|---|------|-----|-----|------|
| 99  | 0 | 12   | 5   | 5.5 | 77.5 |
| 100 | 0 | 14.5 | 5   | 5.5 | 75   |
| 101 | 0 | 17   | 5   | 5.5 | 72.5 |
| 102 | 0 | 19.5 | 5   | 5.5 | 70   |
| 103 | 0 | 7    | 5   | 6   | 82   |
| 104 | 0 | 9.5  | 5   | 6   | 79.5 |
| 105 | 0 | 12   | 5   | 6   | 77   |
| 106 | 0 | 14.5 | 5   | 6   | 74.5 |
| 107 | 0 | 17   | 5   | 6   | 72   |
| 108 | 0 | 19.5 | 5   | 6   | 69.5 |
| 109 | 0 | 7    | 7.5 | 3.5 | 82   |
| 110 | 0 | 9.5  | 7.5 | 3.5 | 79.5 |
| 111 | 0 | 12   | 7.5 | 3.5 | 77   |
| 112 | 0 | 14.5 | 7.5 | 3.5 | 74.5 |
| 113 | 0 | 17   | 7.5 | 3.5 | 72   |
| 114 | 0 | 19.5 | 7.5 | 3.5 | 69.5 |
| 115 | 0 | 7    | 7.5 | 4   | 81.5 |
| 116 | 0 | 9.5  | 7.5 | 4   | 79   |
| 117 | 0 | 12   | 7.5 | 4   | 76.5 |
| 118 | 0 | 14.5 | 7.5 | 4   | 74   |
| 119 | 0 | 17   | 7.5 | 4   | 71.5 |
| 120 | 0 | 19.5 | 7.5 | 4   | 69   |
| 121 | 0 | 7    | 7.5 | 4.5 | 81   |
| 122 | 0 | 9.5  | 7.5 | 4.5 | 78.5 |
| 123 | 0 | 12   | 7.5 | 4.5 | 76   |
| 124 | 0 | 14.5 | 7.5 | 4.5 | 73.5 |
| 125 | 0 | 17   | 7.5 | 4.5 | 71   |
| 126 | 0 | 19.5 | 7.5 | 4.5 | 68.5 |
| 127 | 0 | 7    | 7.5 | 5   | 80.5 |
| 128 | 0 | 9.5  | 7.5 | 5   | 78   |
| 129 | 0 | 12   | 7.5 | 5   | 75.5 |
| 130 | 0 | 14.5 | 7.5 | 5   | 73   |
| 131 | 0 | 17   | 7.5 | 5   | 70.5 |
| 132 | 0 | 19.5 | 7.5 | 5   | 68   |
| 133 | 0 | 7    | 7.5 | 5.5 | 80   |
| 134 | 0 | 9.5  | 7.5 | 5.5 | 77.5 |
| 135 | 0 | 12   | 7.5 | 5.5 | 75   |
| 136 | 0 | 14.5 | 7.5 | 5.5 | 72.5 |
| 137 | 0 | 17   | 7.5 | 5.5 | 70   |
| 138 | 0 | 19.5 | 7.5 | 5.5 | 67.5 |
| 139 | 0 | 7    | 7.5 | 6   | 79.5 |
| 140 | 0 | 9.5  | 7.5 | 6   | 77   |
| 141 | 0 | 12   | 7.5 | 6   | 74.5 |
| 142 | 0 | 14.5 | 7.5 | 6   | 72   |



|     |   |      |     |     |      |
|-----|---|------|-----|-----|------|
| 143 | 0 | 17   | 7.5 | 6   | 69.5 |
| 144 | 0 | 19.5 | 7.5 | 6   | 67   |
| 145 | 0 | 7    | 10  | 3.5 | 79.5 |
| 146 | 0 | 9.5  | 10  | 3.5 | 77   |
| 147 | 0 | 12   | 10  | 3.5 | 74.5 |
| 148 | 0 | 14.5 | 10  | 3.5 | 72   |
| 149 | 0 | 17   | 10  | 3.5 | 69.5 |
| 150 | 0 | 19.5 | 10  | 3.5 | 67   |
| 151 | 0 | 7    | 10  | 4   | 79   |
| 152 | 0 | 9.5  | 10  | 4   | 76.5 |
| 153 | 0 | 12   | 10  | 4   | 74   |
| 154 | 0 | 14.5 | 10  | 4   | 71.5 |
| 155 | 0 | 17   | 10  | 4   | 69   |
| 156 | 0 | 19.5 | 10  | 4   | 66.5 |
| 157 | 0 | 7    | 10  | 4.5 | 78.5 |
| 158 | 0 | 9.5  | 10  | 4.5 | 76   |
| 159 | 0 | 12   | 10  | 4.5 | 73.5 |
| 160 | 0 | 14.5 | 10  | 4.5 | 71   |
| 161 | 0 | 17   | 10  | 4.5 | 68.5 |
| 162 | 0 | 19.5 | 10  | 4.5 | 66   |
| 163 | 0 | 7    | 10  | 5   | 78   |
| 164 | 0 | 9.5  | 10  | 5   | 75.5 |
| 165 | 0 | 12   | 10  | 5   | 73   |
| 166 | 0 | 14.5 | 10  | 5   | 70.5 |
| 167 | 0 | 17   | 10  | 5   | 68   |
| 168 | 0 | 19.5 | 10  | 5   | 65.5 |
| 169 | 0 | 7    | 10  | 5.5 | 77.5 |
| 170 | 0 | 9.5  | 10  | 5.5 | 75   |
| 171 | 0 | 12   | 10  | 5.5 | 72.5 |
| 172 | 0 | 14.5 | 10  | 5.5 | 70   |
| 173 | 0 | 17   | 10  | 5.5 | 67.5 |
| 174 | 0 | 19.5 | 10  | 5.5 | 65   |
| 175 | 0 | 7    | 10  | 6   | 77   |
| 176 | 0 | 9.5  | 10  | 6   | 74.5 |
| 177 | 0 | 12   | 10  | 6   | 72   |
| 178 | 0 | 14.5 | 10  | 6   | 69.5 |
| 179 | 0 | 17   | 10  | 6   | 67   |
| 180 | 0 | 19.5 | 10  | 6   | 64.5 |
| 181 | 1 | 7    | 0   | 3.5 | 88.5 |
| 182 | 1 | 9.5  | 0   | 3.5 | 86   |
| 183 | 1 | 12   | 0   | 3.5 | 83.5 |
| 184 | 1 | 14.5 | 0   | 3.5 | 81   |
| 185 | 1 | 17   | 0   | 3.5 | 78.5 |
| 186 | 1 | 19.5 | 0   | 3.5 | 76   |

|     |   |      |     |     |      |
|-----|---|------|-----|-----|------|
| 187 | 1 | 7    | 0   | 4   | 88   |
| 188 | 1 | 9.5  | 0   | 4   | 85.5 |
| 189 | 1 | 12   | 0   | 4   | 83   |
| 190 | 1 | 14.5 | 0   | 4   | 80.5 |
| 191 | 1 | 17   | 0   | 4   | 78   |
| 192 | 1 | 19.5 | 0   | 4   | 75.5 |
| 193 | 1 | 7    | 0   | 4.5 | 87.5 |
| 194 | 1 | 9.5  | 0   | 4.5 | 85   |
| 195 | 1 | 12   | 0   | 4.5 | 82.5 |
| 196 | 1 | 14.5 | 0   | 4.5 | 80   |
| 197 | 1 | 17   | 0   | 4.5 | 77.5 |
| 198 | 1 | 19.5 | 0   | 4.5 | 75   |
| 199 | 1 | 7    | 0   | 5   | 87   |
| 200 | 1 | 9.5  | 0   | 5   | 84.5 |
| 201 | 1 | 12   | 0   | 5   | 82   |
| 202 | 1 | 14.5 | 0   | 5   | 79.5 |
| 203 | 1 | 17   | 0   | 5   | 77   |
| 204 | 1 | 19.5 | 0   | 5   | 74.5 |
| 205 | 1 | 7    | 0   | 5.5 | 86.5 |
| 206 | 1 | 9.5  | 0   | 5.5 | 84   |
| 207 | 1 | 12   | 0   | 5.5 | 81.5 |
| 208 | 1 | 14.5 | 0   | 5.5 | 79   |
| 209 | 1 | 17   | 0   | 5.5 | 76.5 |
| 210 | 1 | 19.5 | 0   | 5.5 | 74   |
| 211 | 1 | 7    | 0   | 6   | 86   |
| 212 | 1 | 9.5  | 0   | 6   | 83.5 |
| 213 | 1 | 12   | 0   | 6   | 81   |
| 214 | 1 | 14.5 | 0   | 6   | 78.5 |
| 215 | 1 | 17   | 0   | 6   | 76   |
| 216 | 1 | 19.5 | 0   | 6   | 73.5 |
| 217 | 1 | 7    | 2.5 | 3.5 | 86   |
| 218 | 1 | 9.5  | 2.5 | 3.5 | 83.5 |
| 219 | 1 | 12   | 2.5 | 3.5 | 81   |
| 220 | 1 | 14.5 | 2.5 | 3.5 | 78.5 |
| 221 | 1 | 17   | 2.5 | 3.5 | 76   |
| 222 | 1 | 19.5 | 2.5 | 3.5 | 73.5 |
| 223 | 1 | 7    | 2.5 | 4   | 85.5 |
| 224 | 1 | 9.5  | 2.5 | 4   | 83   |
| 225 | 1 | 12   | 2.5 | 4   | 80.5 |
| 226 | 1 | 14.5 | 2.5 | 4   | 78   |
| 227 | 1 | 17   | 2.5 | 4   | 75.5 |
| 228 | 1 | 19.5 | 2.5 | 4   | 73   |
| 229 | 1 | 7    | 2.5 | 4.5 | 85   |
| 230 | 1 | 9.5  | 2.5 | 4.5 | 82.5 |

|     |   |      |     |     |      |
|-----|---|------|-----|-----|------|
| 231 | 1 | 12   | 2.5 | 4.5 | 80   |
| 232 | 1 | 14.5 | 2.5 | 4.5 | 77.5 |
| 233 | 1 | 17   | 2.5 | 4.5 | 75   |
| 234 | 1 | 19.5 | 2.5 | 4.5 | 72.5 |
| 235 | 1 | 7    | 2.5 | 5   | 84.5 |
| 236 | 1 | 9.5  | 2.5 | 5   | 82   |
| 237 | 1 | 12   | 2.5 | 5   | 79.5 |
| 238 | 1 | 14.5 | 2.5 | 5   | 77   |
| 239 | 1 | 17   | 2.5 | 5   | 74.5 |
| 240 | 1 | 19.5 | 2.5 | 5   | 72   |
| 241 | 1 | 7    | 2.5 | 5.5 | 84   |
| 242 | 1 | 9.5  | 2.5 | 5.5 | 81.5 |
| 243 | 1 | 12   | 2.5 | 5.5 | 79   |
| 244 | 1 | 14.5 | 2.5 | 5.5 | 76.5 |
| 245 | 1 | 17   | 2.5 | 5.5 | 74   |
| 246 | 1 | 19.5 | 2.5 | 5.5 | 71.5 |
| 247 | 1 | 7    | 2.5 | 6   | 83.5 |
| 248 | 1 | 9.5  | 2.5 | 6   | 81   |
| 249 | 1 | 12   | 2.5 | 6   | 78.5 |
| 250 | 1 | 14.5 | 2.5 | 6   | 76   |
| 251 | 1 | 17   | 2.5 | 6   | 73.5 |
| 252 | 1 | 19.5 | 2.5 | 6   | 71   |
| 253 | 1 | 7    | 5   | 3.5 | 83.5 |
| 254 | 1 | 9.5  | 5   | 3.5 | 81   |
| 255 | 1 | 12   | 5   | 3.5 | 78.5 |
| 256 | 1 | 14.5 | 5   | 3.5 | 76   |
| 257 | 1 | 17   | 5   | 3.5 | 73.5 |
| 258 | 1 | 19.5 | 5   | 3.5 | 71   |
| 259 | 1 | 7    | 5   | 4   | 83   |
| 260 | 1 | 9.5  | 5   | 4   | 80.5 |
| 261 | 1 | 12   | 5   | 4   | 78   |
| 262 | 1 | 14.5 | 5   | 4   | 75.5 |
| 263 | 1 | 17   | 5   | 4   | 73   |
| 264 | 1 | 19.5 | 5   | 4   | 70.5 |
| 265 | 1 | 7    | 5   | 4.5 | 82.5 |
| 266 | 1 | 9.5  | 5   | 4.5 | 80   |
| 267 | 1 | 12   | 5   | 4.5 | 77.5 |
| 268 | 1 | 14.5 | 5   | 4.5 | 75   |
| 269 | 1 | 17   | 5   | 4.5 | 72.5 |
| 270 | 1 | 19.5 | 5   | 4.5 | 70   |
| 271 | 1 | 7    | 5   | 5   | 82   |
| 272 | 1 | 9.5  | 5   | 5   | 79.5 |
| 273 | 1 | 12   | 5   | 5   | 77   |
| 274 | 1 | 14.5 | 5   | 5   | 74.5 |

|     |   |      |     |     |      |
|-----|---|------|-----|-----|------|
| 275 | 1 | 17   | 5   | 5   | 72   |
| 276 | 1 | 19.5 | 5   | 5   | 69.5 |
| 277 | 1 | 7    | 5   | 5.5 | 81.5 |
| 278 | 1 | 9.5  | 5   | 5.5 | 79   |
| 279 | 1 | 12   | 5   | 5.5 | 76.5 |
| 280 | 1 | 14.5 | 5   | 5.5 | 74   |
| 281 | 1 | 17   | 5   | 5.5 | 71.5 |
| 282 | 1 | 19.5 | 5   | 5.5 | 69   |
| 283 | 1 | 7    | 5   | 6   | 81   |
| 284 | 1 | 9.5  | 5   | 6   | 78.5 |
| 285 | 1 | 12   | 5   | 6   | 76   |
| 286 | 1 | 14.5 | 5   | 6   | 73.5 |
| 287 | 1 | 17   | 5   | 6   | 71   |
| 288 | 1 | 19.5 | 5   | 6   | 68.5 |
| 289 | 1 | 7    | 7.5 | 3.5 | 81   |
| 290 | 1 | 9.5  | 7.5 | 3.5 | 78.5 |
| 291 | 1 | 12   | 7.5 | 3.5 | 76   |
| 292 | 1 | 14.5 | 7.5 | 3.5 | 73.5 |
| 293 | 1 | 17   | 7.5 | 3.5 | 71   |
| 294 | 1 | 19.5 | 7.5 | 3.5 | 68.5 |
| 295 | 1 | 7    | 7.5 | 4   | 80.5 |
| 296 | 1 | 9.5  | 7.5 | 4   | 78   |
| 297 | 1 | 12   | 7.5 | 4   | 75.5 |
| 298 | 1 | 14.5 | 7.5 | 4   | 73   |
| 299 | 1 | 17   | 7.5 | 4   | 70.5 |
| 300 | 1 | 19.5 | 7.5 | 4   | 68   |
| 301 | 1 | 7    | 7.5 | 4.5 | 80   |
| 302 | 1 | 9.5  | 7.5 | 4.5 | 77.5 |
| 303 | 1 | 12   | 7.5 | 4.5 | 75   |
| 304 | 1 | 14.5 | 7.5 | 4.5 | 72.5 |
| 305 | 1 | 17   | 7.5 | 4.5 | 70   |
| 306 | 1 | 19.5 | 7.5 | 4.5 | 67.5 |
| 307 | 1 | 7    | 7.5 | 5   | 79.5 |
| 308 | 1 | 9.5  | 7.5 | 5   | 77   |
| 309 | 1 | 12   | 7.5 | 5   | 74.5 |
| 310 | 1 | 14.5 | 7.5 | 5   | 72   |
| 311 | 1 | 17   | 7.5 | 5   | 69.5 |
| 312 | 1 | 19.5 | 7.5 | 5   | 67   |
| 313 | 1 | 7    | 7.5 | 5.5 | 79   |
| 314 | 1 | 9.5  | 7.5 | 5.5 | 76.5 |
| 315 | 1 | 12   | 7.5 | 5.5 | 74   |
| 316 | 1 | 14.5 | 7.5 | 5.5 | 71.5 |
| 317 | 1 | 17   | 7.5 | 5.5 | 69   |
| 318 | 1 | 19.5 | 7.5 | 5.5 | 66.5 |

|     |   |      |     |     |      |
|-----|---|------|-----|-----|------|
| 319 | 1 | 7    | 7.5 | 6   | 78.5 |
| 320 | 1 | 9.5  | 7.5 | 6   | 76   |
| 321 | 1 | 12   | 7.5 | 6   | 73.5 |
| 322 | 1 | 14.5 | 7.5 | 6   | 71   |
| 323 | 1 | 17   | 7.5 | 6   | 68.5 |
| 324 | 1 | 19.5 | 7.5 | 6   | 66   |
| 325 | 1 | 7    | 10  | 3.5 | 78.5 |
| 326 | 1 | 9.5  | 10  | 3.5 | 76   |
| 327 | 1 | 12   | 10  | 3.5 | 73.5 |
| 328 | 1 | 14.5 | 10  | 3.5 | 71   |
| 329 | 1 | 17   | 10  | 3.5 | 68.5 |
| 330 | 1 | 19.5 | 10  | 3.5 | 66   |
| 331 | 1 | 7    | 10  | 4   | 78   |
| 332 | 1 | 9.5  | 10  | 4   | 75.5 |
| 333 | 1 | 12   | 10  | 4   | 73   |
| 334 | 1 | 14.5 | 10  | 4   | 70.5 |
| 335 | 1 | 17   | 10  | 4   | 68   |
| 336 | 1 | 19.5 | 10  | 4   | 65.5 |
| 337 | 1 | 7    | 10  | 4.5 | 77.5 |
| 338 | 1 | 9.5  | 10  | 4.5 | 75   |
| 339 | 1 | 12   | 10  | 4.5 | 72.5 |
| 340 | 1 | 14.5 | 10  | 4.5 | 70   |
| 341 | 1 | 17   | 10  | 4.5 | 67.5 |
| 342 | 1 | 19.5 | 10  | 4.5 | 65   |
| 343 | 1 | 7    | 10  | 5   | 77   |
| 344 | 1 | 9.5  | 10  | 5   | 74.5 |
| 345 | 1 | 12   | 10  | 5   | 72   |
| 346 | 1 | 14.5 | 10  | 5   | 69.5 |
| 347 | 1 | 17   | 10  | 5   | 67   |
| 348 | 1 | 19.5 | 10  | 5   | 64.5 |
| 349 | 1 | 7    | 10  | 5.5 | 76.5 |
| 350 | 1 | 9.5  | 10  | 5.5 | 74   |
| 351 | 1 | 12   | 10  | 5.5 | 71.5 |
| 352 | 1 | 14.5 | 10  | 5.5 | 69   |
| 353 | 1 | 17   | 10  | 5.5 | 66.5 |
| 354 | 1 | 19.5 | 10  | 5.5 | 64   |
| 355 | 1 | 7    | 10  | 6   | 76   |
| 356 | 1 | 9.5  | 10  | 6   | 73.5 |
| 357 | 1 | 12   | 10  | 6   | 71   |
| 358 | 1 | 14.5 | 10  | 6   | 68.5 |
| 359 | 1 | 17   | 10  | 6   | 66   |
| 360 | 1 | 19.5 | 10  | 6   | 63.5 |
| 361 | 2 | 7    | 0   | 3.5 | 87.5 |
| 362 | 2 | 9.5  | 0   | 3.5 | 85   |

|     |   |      |     |     |      |
|-----|---|------|-----|-----|------|
| 363 | 2 | 12   | 0   | 3.5 | 82.5 |
| 364 | 2 | 14.5 | 0   | 3.5 | 80   |
| 365 | 2 | 17   | 0   | 3.5 | 77.5 |
| 366 | 2 | 19.5 | 0   | 3.5 | 75   |
| 367 | 2 | 7    | 0   | 4   | 87   |
| 368 | 2 | 9.5  | 0   | 4   | 84.5 |
| 369 | 2 | 12   | 0   | 4   | 82   |
| 370 | 2 | 14.5 | 0   | 4   | 79.5 |
| 371 | 2 | 17   | 0   | 4   | 77   |
| 372 | 2 | 19.5 | 0   | 4   | 74.5 |
| 373 | 2 | 7    | 0   | 4.5 | 86.5 |
| 374 | 2 | 9.5  | 0   | 4.5 | 84   |
| 375 | 2 | 12   | 0   | 4.5 | 81.5 |
| 376 | 2 | 14.5 | 0   | 4.5 | 79   |
| 377 | 2 | 17   | 0   | 4.5 | 76.5 |
| 378 | 2 | 19.5 | 0   | 4.5 | 74   |
| 379 | 2 | 7    | 0   | 5   | 86   |
| 380 | 2 | 9.5  | 0   | 5   | 83.5 |
| 381 | 2 | 12   | 0   | 5   | 81   |
| 382 | 2 | 14.5 | 0   | 5   | 78.5 |
| 383 | 2 | 17   | 0   | 5   | 76   |
| 384 | 2 | 19.5 | 0   | 5   | 73.5 |
| 385 | 2 | 7    | 0   | 5.5 | 85.5 |
| 386 | 2 | 9.5  | 0   | 5.5 | 83   |
| 387 | 2 | 12   | 0   | 5.5 | 80.5 |
| 388 | 2 | 14.5 | 0   | 5.5 | 78   |
| 389 | 2 | 17   | 0   | 5.5 | 75.5 |
| 390 | 2 | 19.5 | 0   | 5.5 | 73   |
| 391 | 2 | 7    | 0   | 6   | 85   |
| 392 | 2 | 9.5  | 0   | 6   | 82.5 |
| 393 | 2 | 12   | 0   | 6   | 80   |
| 394 | 2 | 14.5 | 0   | 6   | 77.5 |
| 395 | 2 | 17   | 0   | 6   | 75   |
| 396 | 2 | 19.5 | 0   | 6   | 72.5 |
| 397 | 2 | 7    | 2.5 | 3.5 | 85   |
| 398 | 2 | 9.5  | 2.5 | 3.5 | 82.5 |
| 399 | 2 | 12   | 2.5 | 3.5 | 80   |
| 400 | 2 | 14.5 | 2.5 | 3.5 | 77.5 |
| 401 | 2 | 17   | 2.5 | 3.5 | 75   |
| 402 | 2 | 19.5 | 2.5 | 3.5 | 72.5 |
| 403 | 2 | 7    | 2.5 | 4   | 84.5 |
| 404 | 2 | 9.5  | 2.5 | 4   | 82   |
| 405 | 2 | 12   | 2.5 | 4   | 79.5 |
| 406 | 2 | 14.5 | 2.5 | 4   | 77   |

|     |   |      |     |     |      |
|-----|---|------|-----|-----|------|
| 407 | 2 | 17   | 2.5 | 4   | 74.5 |
| 408 | 2 | 19.5 | 2.5 | 4   | 72   |
| 409 | 2 | 7    | 2.5 | 4.5 | 84   |
| 410 | 2 | 9.5  | 2.5 | 4.5 | 81.5 |
| 411 | 2 | 12   | 2.5 | 4.5 | 79   |
| 412 | 2 | 14.5 | 2.5 | 4.5 | 76.5 |
| 413 | 2 | 17   | 2.5 | 4.5 | 74   |
| 414 | 2 | 19.5 | 2.5 | 4.5 | 71.5 |
| 415 | 2 | 7    | 2.5 | 5   | 83.5 |
| 416 | 2 | 9.5  | 2.5 | 5   | 81   |
| 417 | 2 | 12   | 2.5 | 5   | 78.5 |
| 418 | 2 | 14.5 | 2.5 | 5   | 76   |
| 419 | 2 | 17   | 2.5 | 5   | 73.5 |
| 420 | 2 | 19.5 | 2.5 | 5   | 71   |
| 421 | 2 | 7    | 2.5 | 5.5 | 83   |
| 422 | 2 | 9.5  | 2.5 | 5.5 | 80.5 |
| 423 | 2 | 12   | 2.5 | 5.5 | 78   |
| 424 | 2 | 14.5 | 2.5 | 5.5 | 75.5 |
| 425 | 2 | 17   | 2.5 | 5.5 | 73   |
| 426 | 2 | 19.5 | 2.5 | 5.5 | 70.5 |
| 427 | 2 | 7    | 2.5 | 6   | 82.5 |
| 428 | 2 | 9.5  | 2.5 | 6   | 80   |
| 429 | 2 | 12   | 2.5 | 6   | 77.5 |
| 430 | 2 | 14.5 | 2.5 | 6   | 75   |
| 431 | 2 | 17   | 2.5 | 6   | 72.5 |
| 432 | 2 | 19.5 | 2.5 | 6   | 70   |
| 433 | 2 | 7    | 5   | 3.5 | 82.5 |
| 434 | 2 | 9.5  | 5   | 3.5 | 80   |
| 435 | 2 | 12   | 5   | 3.5 | 77.5 |
| 436 | 2 | 14.5 | 5   | 3.5 | 75   |
| 437 | 2 | 17   | 5   | 3.5 | 72.5 |
| 438 | 2 | 19.5 | 5   | 3.5 | 70   |
| 439 | 2 | 7    | 5   | 4   | 82   |
| 440 | 2 | 9.5  | 5   | 4   | 79.5 |
| 441 | 2 | 12   | 5   | 4   | 77   |
| 442 | 2 | 14.5 | 5   | 4   | 74.5 |
| 443 | 2 | 17   | 5   | 4   | 72   |
| 444 | 2 | 19.5 | 5   | 4   | 69.5 |
| 445 | 2 | 7    | 5   | 4.5 | 81.5 |
| 446 | 2 | 9.5  | 5   | 4.5 | 79   |
| 447 | 2 | 12   | 5   | 4.5 | 76.5 |
| 448 | 2 | 14.5 | 5   | 4.5 | 74   |
| 449 | 2 | 17   | 5   | 4.5 | 71.5 |
| 450 | 2 | 19.5 | 5   | 4.5 | 69   |

|     |   |      |     |     |      |
|-----|---|------|-----|-----|------|
| 451 | 2 | 7    | 5   | 5   | 81   |
| 452 | 2 | 9.5  | 5   | 5   | 78.5 |
| 453 | 2 | 12   | 5   | 5   | 76   |
| 454 | 2 | 14.5 | 5   | 5   | 73.5 |
| 455 | 2 | 17   | 5   | 5   | 71   |
| 456 | 2 | 19.5 | 5   | 5   | 68.5 |
| 457 | 2 | 7    | 5   | 5.5 | 80.5 |
| 458 | 2 | 9.5  | 5   | 5.5 | 78   |
| 459 | 2 | 12   | 5   | 5.5 | 75.5 |
| 460 | 2 | 14.5 | 5   | 5.5 | 73   |
| 461 | 2 | 17   | 5   | 5.5 | 70.5 |
| 462 | 2 | 19.5 | 5   | 5.5 | 68   |
| 463 | 2 | 7    | 5   | 6   | 80   |
| 464 | 2 | 9.5  | 5   | 6   | 77.5 |
| 465 | 2 | 12   | 5   | 6   | 75   |
| 466 | 2 | 14.5 | 5   | 6   | 72.5 |
| 467 | 2 | 17   | 5   | 6   | 70   |
| 468 | 2 | 19.5 | 5   | 6   | 67.5 |
| 469 | 2 | 7    | 7.5 | 3.5 | 80   |
| 470 | 2 | 9.5  | 7.5 | 3.5 | 77.5 |
| 471 | 2 | 12   | 7.5 | 3.5 | 75   |
| 472 | 2 | 14.5 | 7.5 | 3.5 | 72.5 |
| 473 | 2 | 17   | 7.5 | 3.5 | 70   |
| 474 | 2 | 19.5 | 7.5 | 3.5 | 67.5 |
| 475 | 2 | 7    | 7.5 | 4   | 79.5 |
| 476 | 2 | 9.5  | 7.5 | 4   | 77   |
| 477 | 2 | 12   | 7.5 | 4   | 74.5 |
| 478 | 2 | 14.5 | 7.5 | 4   | 72   |
| 479 | 2 | 17   | 7.5 | 4   | 69.5 |
| 480 | 2 | 19.5 | 7.5 | 4   | 67   |
| 481 | 2 | 7    | 7.5 | 4.5 | 79   |
| 482 | 2 | 9.5  | 7.5 | 4.5 | 76.5 |
| 483 | 2 | 12   | 7.5 | 4.5 | 74   |
| 484 | 2 | 14.5 | 7.5 | 4.5 | 71.5 |
| 485 | 2 | 17   | 7.5 | 4.5 | 69   |
| 486 | 2 | 19.5 | 7.5 | 4.5 | 66.5 |
| 487 | 2 | 7    | 7.5 | 5   | 78.5 |
| 488 | 2 | 9.5  | 7.5 | 5   | 76   |
| 489 | 2 | 12   | 7.5 | 5   | 73.5 |
| 490 | 2 | 14.5 | 7.5 | 5   | 71   |
| 491 | 2 | 17   | 7.5 | 5   | 68.5 |
| 492 | 2 | 19.5 | 7.5 | 5   | 66   |
| 493 | 2 | 7    | 7.5 | 5.5 | 78   |
| 494 | 2 | 9.5  | 7.5 | 5.5 | 75.5 |



|     |   |      |     |     |      |
|-----|---|------|-----|-----|------|
| 495 | 2 | 12   | 7.5 | 5.5 | 73   |
| 496 | 2 | 14.5 | 7.5 | 5.5 | 70.5 |
| 497 | 2 | 17   | 7.5 | 5.5 | 68   |
| 498 | 2 | 19.5 | 7.5 | 5.5 | 65.5 |
| 499 | 2 | 7    | 7.5 | 6   | 77.5 |
| 500 | 2 | 9.5  | 7.5 | 6   | 75   |
| 501 | 2 | 12   | 7.5 | 6   | 72.5 |
| 502 | 2 | 14.5 | 7.5 | 6   | 70   |
| 503 | 2 | 17   | 7.5 | 6   | 67.5 |
| 504 | 2 | 19.5 | 7.5 | 6   | 65   |
| 505 | 2 | 7    | 10  | 3.5 | 77.5 |
| 506 | 2 | 9.5  | 10  | 3.5 | 75   |
| 507 | 2 | 12   | 10  | 3.5 | 72.5 |
| 508 | 2 | 14.5 | 10  | 3.5 | 70   |
| 509 | 2 | 17   | 10  | 3.5 | 67.5 |
| 510 | 2 | 19.5 | 10  | 3.5 | 65   |
| 511 | 2 | 7    | 10  | 4   | 77   |
| 512 | 2 | 9.5  | 10  | 4   | 74.5 |
| 513 | 2 | 12   | 10  | 4   | 72   |
| 514 | 2 | 14.5 | 10  | 4   | 69.5 |
| 515 | 2 | 17   | 10  | 4   | 67   |
| 516 | 2 | 19.5 | 10  | 4   | 64.5 |
| 517 | 2 | 7    | 10  | 4.5 | 76.5 |
| 518 | 2 | 9.5  | 10  | 4.5 | 74   |
| 519 | 2 | 12   | 10  | 4.5 | 71.5 |
| 520 | 2 | 14.5 | 10  | 4.5 | 69   |
| 521 | 2 | 17   | 10  | 4.5 | 66.5 |
| 522 | 2 | 19.5 | 10  | 4.5 | 64   |
| 523 | 2 | 7    | 10  | 5   | 76   |
| 524 | 2 | 9.5  | 10  | 5   | 73.5 |
| 525 | 2 | 12   | 10  | 5   | 71   |
| 526 | 2 | 14.5 | 10  | 5   | 68.5 |
| 527 | 2 | 17   | 10  | 5   | 66   |
| 528 | 2 | 19.5 | 10  | 5   | 63.5 |
| 529 | 2 | 7    | 10  | 5.5 | 75.5 |
| 530 | 2 | 9.5  | 10  | 5.5 | 73   |
| 531 | 2 | 12   | 10  | 5.5 | 70.5 |
| 532 | 2 | 14.5 | 10  | 5.5 | 68   |
| 533 | 2 | 17   | 10  | 5.5 | 65.5 |
| 534 | 2 | 19.5 | 10  | 5.5 | 63   |
| 535 | 2 | 7    | 10  | 6   | 75   |
| 536 | 2 | 9.5  | 10  | 6   | 72.5 |
| 537 | 2 | 12   | 10  | 6   | 70   |
| 538 | 2 | 14.5 | 10  | 6   | 67.5 |

|     |   |      |     |     |      |
|-----|---|------|-----|-----|------|
| 539 | 2 | 17   | 10  | 6   | 65   |
| 540 | 2 | 19.5 | 10  | 6   | 62.5 |
| 541 | 3 | 7    | 0   | 3.5 | 86.5 |
| 542 | 3 | 9.5  | 0   | 3.5 | 84   |
| 543 | 3 | 12   | 0   | 3.5 | 81.5 |
| 544 | 3 | 14.5 | 0   | 3.5 | 79   |
| 545 | 3 | 17   | 0   | 3.5 | 76.5 |
| 546 | 3 | 19.5 | 0   | 3.5 | 74   |
| 547 | 3 | 7    | 0   | 4   | 86   |
| 548 | 3 | 9.5  | 0   | 4   | 83.5 |
| 549 | 3 | 12   | 0   | 4   | 81   |
| 550 | 3 | 14.5 | 0   | 4   | 78.5 |
| 551 | 3 | 17   | 0   | 4   | 76   |
| 552 | 3 | 19.5 | 0   | 4   | 73.5 |
| 553 | 3 | 7    | 0   | 4.5 | 85.5 |
| 554 | 3 | 9.5  | 0   | 4.5 | 83   |
| 555 | 3 | 12   | 0   | 4.5 | 80.5 |
| 556 | 3 | 14.5 | 0   | 4.5 | 78   |
| 557 | 3 | 17   | 0   | 4.5 | 75.5 |
| 558 | 3 | 19.5 | 0   | 4.5 | 73   |
| 559 | 3 | 7    | 0   | 5   | 85   |
| 560 | 3 | 9.5  | 0   | 5   | 82.5 |
| 561 | 3 | 12   | 0   | 5   | 80   |
| 562 | 3 | 14.5 | 0   | 5   | 77.5 |
| 563 | 3 | 17   | 0   | 5   | 75   |
| 564 | 3 | 19.5 | 0   | 5   | 72.5 |
| 565 | 3 | 7    | 0   | 5.5 | 84.5 |
| 566 | 3 | 9.5  | 0   | 5.5 | 82   |
| 567 | 3 | 12   | 0   | 5.5 | 79.5 |
| 568 | 3 | 14.5 | 0   | 5.5 | 77   |
| 569 | 3 | 17   | 0   | 5.5 | 74.5 |
| 570 | 3 | 19.5 | 0   | 5.5 | 72   |
| 571 | 3 | 7    | 0   | 6   | 84   |
| 572 | 3 | 9.5  | 0   | 6   | 81.5 |
| 573 | 3 | 12   | 0   | 6   | 79   |
| 574 | 3 | 14.5 | 0   | 6   | 76.5 |
| 575 | 3 | 17   | 0   | 6   | 74   |
| 576 | 3 | 19.5 | 0   | 6   | 71.5 |
| 577 | 3 | 7    | 2.5 | 3.5 | 84   |
| 578 | 3 | 9.5  | 2.5 | 3.5 | 81.5 |
| 579 | 3 | 12   | 2.5 | 3.5 | 79   |
| 580 | 3 | 14.5 | 2.5 | 3.5 | 76.5 |
| 581 | 3 | 17   | 2.5 | 3.5 | 74   |
| 582 | 3 | 19.5 | 2.5 | 3.5 | 71.5 |

|     |   |      |     |     |      |
|-----|---|------|-----|-----|------|
| 583 | 3 | 7    | 2.5 | 4   | 83.5 |
| 584 | 3 | 9.5  | 2.5 | 4   | 81   |
| 585 | 3 | 12   | 2.5 | 4   | 78.5 |
| 586 | 3 | 14.5 | 2.5 | 4   | 76   |
| 587 | 3 | 17   | 2.5 | 4   | 73.5 |
| 588 | 3 | 19.5 | 2.5 | 4   | 71   |
| 589 | 3 | 7    | 2.5 | 4.5 | 83   |
| 590 | 3 | 9.5  | 2.5 | 4.5 | 80.5 |
| 591 | 3 | 12   | 2.5 | 4.5 | 78   |
| 592 | 3 | 14.5 | 2.5 | 4.5 | 75.5 |
| 593 | 3 | 17   | 2.5 | 4.5 | 73   |
| 594 | 3 | 19.5 | 2.5 | 4.5 | 70.5 |
| 595 | 3 | 7    | 2.5 | 5   | 82.5 |
| 596 | 3 | 9.5  | 2.5 | 5   | 80   |
| 597 | 3 | 12   | 2.5 | 5   | 77.5 |
| 598 | 3 | 14.5 | 2.5 | 5   | 75   |
| 599 | 3 | 17   | 2.5 | 5   | 72.5 |
| 600 | 3 | 19.5 | 2.5 | 5   | 70   |
| 601 | 3 | 7    | 2.5 | 5.5 | 82   |
| 602 | 3 | 9.5  | 2.5 | 5.5 | 79.5 |
| 603 | 3 | 12   | 2.5 | 5.5 | 77   |
| 604 | 3 | 14.5 | 2.5 | 5.5 | 74.5 |
| 605 | 3 | 17   | 2.5 | 5.5 | 72   |
| 606 | 3 | 19.5 | 2.5 | 5.5 | 69.5 |
| 607 | 3 | 7    | 2.5 | 6   | 81.5 |
| 608 | 3 | 9.5  | 2.5 | 6   | 79   |
| 609 | 3 | 12   | 2.5 | 6   | 76.5 |
| 610 | 3 | 14.5 | 2.5 | 6   | 74   |
| 611 | 3 | 17   | 2.5 | 6   | 71.5 |
| 612 | 3 | 19.5 | 2.5 | 6   | 69   |
| 613 | 3 | 7    | 5   | 3.5 | 81.5 |
| 614 | 3 | 9.5  | 5   | 3.5 | 79   |
| 615 | 3 | 12   | 5   | 3.5 | 76.5 |
| 616 | 3 | 14.5 | 5   | 3.5 | 74   |
| 617 | 3 | 17   | 5   | 3.5 | 71.5 |
| 618 | 3 | 19.5 | 5   | 3.5 | 69   |
| 619 | 3 | 7    | 5   | 4   | 81   |
| 620 | 3 | 9.5  | 5   | 4   | 78.5 |
| 621 | 3 | 12   | 5   | 4   | 76   |
| 622 | 3 | 14.5 | 5   | 4   | 73.5 |
| 623 | 3 | 17   | 5   | 4   | 71   |
| 624 | 3 | 19.5 | 5   | 4   | 68.5 |
| 625 | 3 | 7    | 5   | 4.5 | 80.5 |
| 626 | 3 | 9.5  | 5   | 4.5 | 78   |

|     |   |      |     |     |      |
|-----|---|------|-----|-----|------|
| 627 | 3 | 12   | 5   | 4.5 | 75.5 |
| 628 | 3 | 14.5 | 5   | 4.5 | 73   |
| 629 | 3 | 17   | 5   | 4.5 | 70.5 |
| 630 | 3 | 19.5 | 5   | 4.5 | 68   |
| 631 | 3 | 7    | 5   | 5   | 80   |
| 632 | 3 | 9.5  | 5   | 5   | 77.5 |
| 633 | 3 | 12   | 5   | 5   | 75   |
| 634 | 3 | 14.5 | 5   | 5   | 72.5 |
| 635 | 3 | 17   | 5   | 5   | 70   |
| 636 | 3 | 19.5 | 5   | 5   | 67.5 |
| 637 | 3 | 7    | 5   | 5.5 | 79.5 |
| 638 | 3 | 9.5  | 5   | 5.5 | 77   |
| 639 | 3 | 12   | 5   | 5.5 | 74.5 |
| 640 | 3 | 14.5 | 5   | 5.5 | 72   |
| 641 | 3 | 17   | 5   | 5.5 | 69.5 |
| 642 | 3 | 19.5 | 5   | 5.5 | 67   |
| 643 | 3 | 7    | 5   | 6   | 79   |
| 644 | 3 | 9.5  | 5   | 6   | 76.5 |
| 645 | 3 | 12   | 5   | 6   | 74   |
| 646 | 3 | 14.5 | 5   | 6   | 71.5 |
| 647 | 3 | 17   | 5   | 6   | 69   |
| 648 | 3 | 19.5 | 5   | 6   | 66.5 |
| 649 | 3 | 7    | 7.5 | 3.5 | 79   |
| 650 | 3 | 9.5  | 7.5 | 3.5 | 76.5 |
| 651 | 3 | 12   | 7.5 | 3.5 | 74   |
| 652 | 3 | 14.5 | 7.5 | 3.5 | 71.5 |
| 653 | 3 | 17   | 7.5 | 3.5 | 69   |
| 654 | 3 | 19.5 | 7.5 | 3.5 | 66.5 |
| 655 | 3 | 7    | 7.5 | 4   | 78.5 |
| 656 | 3 | 9.5  | 7.5 | 4   | 76   |
| 657 | 3 | 12   | 7.5 | 4   | 73.5 |
| 658 | 3 | 14.5 | 7.5 | 4   | 71   |
| 659 | 3 | 17   | 7.5 | 4   | 68.5 |
| 660 | 3 | 19.5 | 7.5 | 4   | 66   |
| 661 | 3 | 7    | 7.5 | 4.5 | 78   |
| 662 | 3 | 9.5  | 7.5 | 4.5 | 75.5 |
| 663 | 3 | 12   | 7.5 | 4.5 | 73   |
| 664 | 3 | 14.5 | 7.5 | 4.5 | 70.5 |
| 665 | 3 | 17   | 7.5 | 4.5 | 68   |
| 666 | 3 | 19.5 | 7.5 | 4.5 | 65.5 |
| 667 | 3 | 7    | 7.5 | 5   | 77.5 |
| 668 | 3 | 9.5  | 7.5 | 5   | 75   |
| 669 | 3 | 12   | 7.5 | 5   | 72.5 |
| 670 | 3 | 14.5 | 7.5 | 5   | 70   |

|     |   |      |     |     |      |
|-----|---|------|-----|-----|------|
| 671 | 3 | 17   | 7.5 | 5   | 67.5 |
| 672 | 3 | 19.5 | 7.5 | 5   | 65   |
| 673 | 3 | 7    | 7.5 | 5.5 | 77   |
| 674 | 3 | 9.5  | 7.5 | 5.5 | 74.5 |
| 675 | 3 | 12   | 7.5 | 5.5 | 72   |
| 676 | 3 | 14.5 | 7.5 | 5.5 | 69.5 |
| 677 | 3 | 17   | 7.5 | 5.5 | 67   |
| 678 | 3 | 19.5 | 7.5 | 5.5 | 64.5 |
| 679 | 3 | 7    | 7.5 | 6   | 76.5 |
| 680 | 3 | 9.5  | 7.5 | 6   | 74   |
| 681 | 3 | 12   | 7.5 | 6   | 71.5 |
| 682 | 3 | 14.5 | 7.5 | 6   | 69   |
| 683 | 3 | 17   | 7.5 | 6   | 66.5 |
| 684 | 3 | 19.5 | 7.5 | 6   | 64   |
| 685 | 3 | 7    | 10  | 3.5 | 76.5 |
| 686 | 3 | 9.5  | 10  | 3.5 | 74   |
| 687 | 3 | 12   | 10  | 3.5 | 71.5 |
| 688 | 3 | 14.5 | 10  | 3.5 | 69   |
| 689 | 3 | 17   | 10  | 3.5 | 66.5 |
| 690 | 3 | 19.5 | 10  | 3.5 | 64   |
| 691 | 3 | 7    | 10  | 4   | 76   |
| 692 | 3 | 9.5  | 10  | 4   | 73.5 |
| 693 | 3 | 12   | 10  | 4   | 71   |
| 694 | 3 | 14.5 | 10  | 4   | 68.5 |
| 695 | 3 | 17   | 10  | 4   | 66   |
| 696 | 3 | 19.5 | 10  | 4   | 63.5 |
| 697 | 3 | 7    | 10  | 4.5 | 75.5 |
| 698 | 3 | 9.5  | 10  | 4.5 | 73   |
| 699 | 3 | 12   | 10  | 4.5 | 70.5 |
| 700 | 3 | 14.5 | 10  | 4.5 | 68   |
| 701 | 3 | 17   | 10  | 4.5 | 65.5 |
| 702 | 3 | 19.5 | 10  | 4.5 | 63   |
| 703 | 3 | 7    | 10  | 5   | 75   |
| 704 | 3 | 9.5  | 10  | 5   | 72.5 |
| 705 | 3 | 12   | 10  | 5   | 70   |
| 706 | 3 | 14.5 | 10  | 5   | 67.5 |
| 707 | 3 | 17   | 10  | 5   | 65   |
| 708 | 3 | 19.5 | 10  | 5   | 62.5 |
| 709 | 3 | 7    | 10  | 5.5 | 74.5 |
| 710 | 3 | 9.5  | 10  | 5.5 | 72   |
| 711 | 3 | 12   | 10  | 5.5 | 69.5 |
| 712 | 3 | 14.5 | 10  | 5.5 | 67   |
| 713 | 3 | 17   | 10  | 5.5 | 64.5 |
| 714 | 3 | 19.5 | 10  | 5.5 | 62   |

|     |   |      |     |     |      |
|-----|---|------|-----|-----|------|
| 715 | 3 | 7    | 10  | 6   | 74   |
| 716 | 3 | 9.5  | 10  | 6   | 71.5 |
| 717 | 3 | 12   | 10  | 6   | 69   |
| 718 | 3 | 14.5 | 10  | 6   | 66.5 |
| 719 | 3 | 17   | 10  | 6   | 64   |
| 720 | 3 | 19.5 | 10  | 6   | 61.5 |
| 721 | 4 | 7    | 0   | 3.5 | 85.5 |
| 722 | 4 | 9.5  | 0   | 3.5 | 83   |
| 723 | 4 | 12   | 0   | 3.5 | 80.5 |
| 724 | 4 | 14.5 | 0   | 3.5 | 78   |
| 725 | 4 | 17   | 0   | 3.5 | 75.5 |
| 726 | 4 | 19.5 | 0   | 3.5 | 73   |
| 727 | 4 | 7    | 0   | 4   | 85   |
| 728 | 4 | 9.5  | 0   | 4   | 82.5 |
| 729 | 4 | 12   | 0   | 4   | 80   |
| 730 | 4 | 14.5 | 0   | 4   | 77.5 |
| 731 | 4 | 17   | 0   | 4   | 75   |
| 732 | 4 | 19.5 | 0   | 4   | 72.5 |
| 733 | 4 | 7    | 0   | 4.5 | 84.5 |
| 734 | 4 | 9.5  | 0   | 4.5 | 82   |
| 735 | 4 | 12   | 0   | 4.5 | 79.5 |
| 736 | 4 | 14.5 | 0   | 4.5 | 77   |
| 737 | 4 | 17   | 0   | 4.5 | 74.5 |
| 738 | 4 | 19.5 | 0   | 4.5 | 72   |
| 739 | 4 | 7    | 0   | 5   | 84   |
| 740 | 4 | 9.5  | 0   | 5   | 81.5 |
| 741 | 4 | 12   | 0   | 5   | 79   |
| 742 | 4 | 14.5 | 0   | 5   | 76.5 |
| 743 | 4 | 17   | 0   | 5   | 74   |
| 744 | 4 | 19.5 | 0   | 5   | 71.5 |
| 745 | 4 | 7    | 0   | 5.5 | 83.5 |
| 746 | 4 | 9.5  | 0   | 5.5 | 81   |
| 747 | 4 | 12   | 0   | 5.5 | 78.5 |
| 748 | 4 | 14.5 | 0   | 5.5 | 76   |
| 749 | 4 | 17   | 0   | 5.5 | 73.5 |
| 750 | 4 | 19.5 | 0   | 5.5 | 71   |
| 751 | 4 | 7    | 0   | 6   | 83   |
| 752 | 4 | 9.5  | 0   | 6   | 80.5 |
| 753 | 4 | 12   | 0   | 6   | 78   |
| 754 | 4 | 14.5 | 0   | 6   | 75.5 |
| 755 | 4 | 17   | 0   | 6   | 73   |
| 756 | 4 | 19.5 | 0   | 6   | 70.5 |
| 757 | 4 | 7    | 2.5 | 3.5 | 83   |
| 758 | 4 | 9.5  | 2.5 | 3.5 | 80.5 |

|     |   |      |     |     |      |
|-----|---|------|-----|-----|------|
| 759 | 4 | 12   | 2.5 | 3.5 | 78   |
| 760 | 4 | 14.5 | 2.5 | 3.5 | 75.5 |
| 761 | 4 | 17   | 2.5 | 3.5 | 73   |
| 762 | 4 | 19.5 | 2.5 | 3.5 | 70.5 |
| 763 | 4 | 7    | 2.5 | 4   | 82.5 |
| 764 | 4 | 9.5  | 2.5 | 4   | 80   |
| 765 | 4 | 12   | 2.5 | 4   | 77.5 |
| 766 | 4 | 14.5 | 2.5 | 4   | 75   |
| 767 | 4 | 17   | 2.5 | 4   | 72.5 |
| 768 | 4 | 19.5 | 2.5 | 4   | 70   |
| 769 | 4 | 7    | 2.5 | 4.5 | 82   |
| 770 | 4 | 9.5  | 2.5 | 4.5 | 79.5 |
| 771 | 4 | 12   | 2.5 | 4.5 | 77   |
| 772 | 4 | 14.5 | 2.5 | 4.5 | 74.5 |
| 773 | 4 | 17   | 2.5 | 4.5 | 72   |
| 774 | 4 | 19.5 | 2.5 | 4.5 | 69.5 |
| 775 | 4 | 7    | 2.5 | 5   | 81.5 |
| 776 | 4 | 9.5  | 2.5 | 5   | 79   |
| 777 | 4 | 12   | 2.5 | 5   | 76.5 |
| 778 | 4 | 14.5 | 2.5 | 5   | 74   |
| 779 | 4 | 17   | 2.5 | 5   | 71.5 |
| 780 | 4 | 19.5 | 2.5 | 5   | 69   |
| 781 | 4 | 7    | 2.5 | 5.5 | 81   |
| 782 | 4 | 9.5  | 2.5 | 5.5 | 78.5 |
| 783 | 4 | 12   | 2.5 | 5.5 | 76   |
| 784 | 4 | 14.5 | 2.5 | 5.5 | 73.5 |
| 785 | 4 | 17   | 2.5 | 5.5 | 71   |
| 786 | 4 | 19.5 | 2.5 | 5.5 | 68.5 |
| 787 | 4 | 7    | 2.5 | 6   | 80.5 |
| 788 | 4 | 9.5  | 2.5 | 6   | 78   |
| 789 | 4 | 12   | 2.5 | 6   | 75.5 |
| 790 | 4 | 14.5 | 2.5 | 6   | 73   |
| 791 | 4 | 17   | 2.5 | 6   | 70.5 |
| 792 | 4 | 19.5 | 2.5 | 6   | 68   |
| 793 | 4 | 7    | 5   | 3.5 | 80.5 |
| 794 | 4 | 9.5  | 5   | 3.5 | 78   |
| 795 | 4 | 12   | 5   | 3.5 | 75.5 |
| 796 | 4 | 14.5 | 5   | 3.5 | 73   |
| 797 | 4 | 17   | 5   | 3.5 | 70.5 |
| 798 | 4 | 19.5 | 5   | 3.5 | 68   |
| 799 | 4 | 7    | 5   | 4   | 80   |
| 800 | 4 | 9.5  | 5   | 4   | 77.5 |
| 801 | 4 | 12   | 5   | 4   | 75   |
| 802 | 4 | 14.5 | 5   | 4   | 72.5 |

|     |   |      |     |     |      |
|-----|---|------|-----|-----|------|
| 803 | 4 | 17   | 5   | 4   | 70   |
| 804 | 4 | 19.5 | 5   | 4   | 67.5 |
| 805 | 4 | 7    | 5   | 4.5 | 79.5 |
| 806 | 4 | 9.5  | 5   | 4.5 | 77   |
| 807 | 4 | 12   | 5   | 4.5 | 74.5 |
| 808 | 4 | 14.5 | 5   | 4.5 | 72   |
| 809 | 4 | 17   | 5   | 4.5 | 69.5 |
| 810 | 4 | 19.5 | 5   | 4.5 | 67   |
| 811 | 4 | 7    | 5   | 5   | 79   |
| 812 | 4 | 9.5  | 5   | 5   | 76.5 |
| 813 | 4 | 12   | 5   | 5   | 74   |
| 814 | 4 | 14.5 | 5   | 5   | 71.5 |
| 815 | 4 | 17   | 5   | 5   | 69   |
| 816 | 4 | 19.5 | 5   | 5   | 66.5 |
| 817 | 4 | 7    | 5   | 5.5 | 78.5 |
| 818 | 4 | 9.5  | 5   | 5.5 | 76   |
| 819 | 4 | 12   | 5   | 5.5 | 73.5 |
| 820 | 4 | 14.5 | 5   | 5.5 | 71   |
| 821 | 4 | 17   | 5   | 5.5 | 68.5 |
| 822 | 4 | 19.5 | 5   | 5.5 | 66   |
| 823 | 4 | 7    | 5   | 6   | 78   |
| 824 | 4 | 9.5  | 5   | 6   | 75.5 |
| 825 | 4 | 12   | 5   | 6   | 73   |
| 826 | 4 | 14.5 | 5   | 6   | 70.5 |
| 827 | 4 | 17   | 5   | 6   | 68   |
| 828 | 4 | 19.5 | 5   | 6   | 65.5 |
| 829 | 4 | 7    | 7.5 | 3.5 | 78   |
| 830 | 4 | 9.5  | 7.5 | 3.5 | 75.5 |
| 831 | 4 | 12   | 7.5 | 3.5 | 73   |
| 832 | 4 | 14.5 | 7.5 | 3.5 | 70.5 |
| 833 | 4 | 17   | 7.5 | 3.5 | 68   |
| 834 | 4 | 19.5 | 7.5 | 3.5 | 65.5 |
| 835 | 4 | 7    | 7.5 | 4   | 77.5 |
| 836 | 4 | 9.5  | 7.5 | 4   | 75   |
| 837 | 4 | 12   | 7.5 | 4   | 72.5 |
| 838 | 4 | 14.5 | 7.5 | 4   | 70   |
| 839 | 4 | 17   | 7.5 | 4   | 67.5 |
| 840 | 4 | 19.5 | 7.5 | 4   | 65   |
| 841 | 4 | 7    | 7.5 | 4.5 | 77   |
| 842 | 4 | 9.5  | 7.5 | 4.5 | 74.5 |
| 843 | 4 | 12   | 7.5 | 4.5 | 72   |
| 844 | 4 | 14.5 | 7.5 | 4.5 | 69.5 |
| 845 | 4 | 17   | 7.5 | 4.5 | 67   |
| 846 | 4 | 19.5 | 7.5 | 4.5 | 64.5 |



|     |   |      |     |     |      |
|-----|---|------|-----|-----|------|
| 847 | 4 | 7    | 7.5 | 5   | 76.5 |
| 848 | 4 | 9.5  | 7.5 | 5   | 74   |
| 849 | 4 | 12   | 7.5 | 5   | 71.5 |
| 850 | 4 | 14.5 | 7.5 | 5   | 69   |
| 851 | 4 | 17   | 7.5 | 5   | 66.5 |
| 852 | 4 | 19.5 | 7.5 | 5   | 64   |
| 853 | 4 | 7    | 7.5 | 5.5 | 76   |
| 854 | 4 | 9.5  | 7.5 | 5.5 | 73.5 |
| 855 | 4 | 12   | 7.5 | 5.5 | 71   |
| 856 | 4 | 14.5 | 7.5 | 5.5 | 68.5 |
| 857 | 4 | 17   | 7.5 | 5.5 | 66   |
| 858 | 4 | 19.5 | 7.5 | 5.5 | 63.5 |
| 859 | 4 | 7    | 7.5 | 6   | 75.5 |
| 860 | 4 | 9.5  | 7.5 | 6   | 73   |
| 861 | 4 | 12   | 7.5 | 6   | 70.5 |
| 862 | 4 | 14.5 | 7.5 | 6   | 68   |
| 863 | 4 | 17   | 7.5 | 6   | 65.5 |
| 864 | 4 | 19.5 | 7.5 | 6   | 63   |
| 865 | 4 | 7    | 10  | 3.5 | 75.5 |
| 866 | 4 | 9.5  | 10  | 3.5 | 73   |
| 867 | 4 | 12   | 10  | 3.5 | 70.5 |
| 868 | 4 | 14.5 | 10  | 3.5 | 68   |
| 869 | 4 | 17   | 10  | 3.5 | 65.5 |
| 870 | 4 | 19.5 | 10  | 3.5 | 63   |
| 871 | 4 | 7    | 10  | 4   | 75   |
| 872 | 4 | 9.5  | 10  | 4   | 72.5 |
| 873 | 4 | 12   | 10  | 4   | 70   |
| 874 | 4 | 14.5 | 10  | 4   | 67.5 |
| 875 | 4 | 17   | 10  | 4   | 65   |
| 876 | 4 | 19.5 | 10  | 4   | 62.5 |
| 877 | 4 | 7    | 10  | 4.5 | 74.5 |
| 878 | 4 | 9.5  | 10  | 4.5 | 72   |
| 879 | 4 | 12   | 10  | 4.5 | 69.5 |
| 880 | 4 | 14.5 | 10  | 4.5 | 67   |
| 881 | 4 | 17   | 10  | 4.5 | 64.5 |
| 882 | 4 | 19.5 | 10  | 4.5 | 62   |
| 883 | 4 | 7    | 10  | 5   | 74   |
| 884 | 4 | 9.5  | 10  | 5   | 71.5 |
| 885 | 4 | 12   | 10  | 5   | 69   |
| 886 | 4 | 14.5 | 10  | 5   | 66.5 |
| 887 | 4 | 17   | 10  | 5   | 64   |
| 888 | 4 | 19.5 | 10  | 5   | 61.5 |
| 889 | 4 | 7    | 10  | 5.5 | 73.5 |
| 890 | 4 | 9.5  | 10  | 5.5 | 71   |

|     |   |      |    |     |      |
|-----|---|------|----|-----|------|
| 891 | 4 | 12   | 10 | 5.5 | 68.5 |
| 892 | 4 | 14.5 | 10 | 5.5 | 66   |
| 893 | 4 | 17   | 10 | 5.5 | 63.5 |
| 894 | 4 | 19.5 | 10 | 5.5 | 61   |
| 895 | 4 | 7    | 10 | 6   | 73   |
| 896 | 4 | 9.5  | 10 | 6   | 70.5 |
| 897 | 4 | 12   | 10 | 6   | 68   |
| 898 | 4 | 14.5 | 10 | 6   | 65.5 |
| 899 | 4 | 17   | 10 | 6   | 63   |
| 900 | 4 | 19.5 | 10 | 6   | 60.5 |
| 901 | 5 | 7    | 0  | 3.5 | 84.5 |
| 902 | 5 | 9.5  | 0  | 3.5 | 82   |
| 903 | 5 | 12   | 0  | 3.5 | 79.5 |
| 904 | 5 | 14.5 | 0  | 3.5 | 77   |
| 905 | 5 | 17   | 0  | 3.5 | 74.5 |
| 906 | 5 | 19.5 | 0  | 3.5 | 72   |
| 907 | 5 | 7    | 0  | 4   | 84   |
| 908 | 5 | 9.5  | 0  | 4   | 81.5 |
| 909 | 5 | 12   | 0  | 4   | 79   |
| 910 | 5 | 14.5 | 0  | 4   | 76.5 |
| 911 | 5 | 17   | 0  | 4   | 74   |
| 912 | 5 | 19.5 | 0  | 4   | 71.5 |
| 913 | 5 | 7    | 0  | 4.5 | 83.5 |
| 914 | 5 | 9.5  | 0  | 4.5 | 81   |
| 915 | 5 | 12   | 0  | 4.5 | 78.5 |
| 916 | 5 | 14.5 | 0  | 4.5 | 76   |
| 917 | 5 | 17   | 0  | 4.5 | 73.5 |
| 918 | 5 | 19.5 | 0  | 4.5 | 71   |
| 919 | 5 | 7    | 0  | 5   | 83   |
| 920 | 5 | 9.5  | 0  | 5   | 80.5 |
| 921 | 5 | 12   | 0  | 5   | 78   |
| 922 | 5 | 14.5 | 0  | 5   | 75.5 |
| 923 | 5 | 17   | 0  | 5   | 73   |
| 924 | 5 | 19.5 | 0  | 5   | 70.5 |
| 925 | 5 | 7    | 0  | 5.5 | 82.5 |
| 926 | 5 | 9.5  | 0  | 5.5 | 80   |
| 927 | 5 | 12   | 0  | 5.5 | 77.5 |
| 928 | 5 | 14.5 | 0  | 5.5 | 75   |
| 929 | 5 | 17   | 0  | 5.5 | 72.5 |
| 930 | 5 | 19.5 | 0  | 5.5 | 70   |
| 931 | 5 | 7    | 0  | 6   | 82   |
| 932 | 5 | 9.5  | 0  | 6   | 79.5 |
| 933 | 5 | 12   | 0  | 6   | 77   |
| 934 | 5 | 14.5 | 0  | 6   | 74.5 |

|     |   |      |     |     |      |
|-----|---|------|-----|-----|------|
| 935 | 5 | 17   | 0   | 6   | 72   |
| 936 | 5 | 19.5 | 0   | 6   | 69.5 |
| 937 | 5 | 7    | 2.5 | 3.5 | 82   |
| 938 | 5 | 9.5  | 2.5 | 3.5 | 79.5 |
| 939 | 5 | 12   | 2.5 | 3.5 | 77   |
| 940 | 5 | 14.5 | 2.5 | 3.5 | 74.5 |
| 941 | 5 | 17   | 2.5 | 3.5 | 72   |
| 942 | 5 | 19.5 | 2.5 | 3.5 | 69.5 |
| 943 | 5 | 7    | 2.5 | 4   | 81.5 |
| 944 | 5 | 9.5  | 2.5 | 4   | 79   |
| 945 | 5 | 12   | 2.5 | 4   | 76.5 |
| 946 | 5 | 14.5 | 2.5 | 4   | 74   |
| 947 | 5 | 17   | 2.5 | 4   | 71.5 |
| 948 | 5 | 19.5 | 2.5 | 4   | 69   |
| 949 | 5 | 7    | 2.5 | 4.5 | 81   |
| 950 | 5 | 9.5  | 2.5 | 4.5 | 78.5 |
| 951 | 5 | 12   | 2.5 | 4.5 | 76   |
| 952 | 5 | 14.5 | 2.5 | 4.5 | 73.5 |
| 953 | 5 | 17   | 2.5 | 4.5 | 71   |
| 954 | 5 | 19.5 | 2.5 | 4.5 | 68.5 |
| 955 | 5 | 7    | 2.5 | 5   | 80.5 |
| 956 | 5 | 9.5  | 2.5 | 5   | 78   |
| 957 | 5 | 12   | 2.5 | 5   | 75.5 |
| 958 | 5 | 14.5 | 2.5 | 5   | 73   |
| 959 | 5 | 17   | 2.5 | 5   | 70.5 |
| 960 | 5 | 19.5 | 2.5 | 5   | 68   |
| 961 | 5 | 7    | 2.5 | 5.5 | 80   |
| 962 | 5 | 9.5  | 2.5 | 5.5 | 77.5 |
| 963 | 5 | 12   | 2.5 | 5.5 | 75   |
| 964 | 5 | 14.5 | 2.5 | 5.5 | 72.5 |
| 965 | 5 | 17   | 2.5 | 5.5 | 70   |
| 966 | 5 | 19.5 | 2.5 | 5.5 | 67.5 |
| 967 | 5 | 7    | 2.5 | 6   | 79.5 |
| 968 | 5 | 9.5  | 2.5 | 6   | 77   |
| 969 | 5 | 12   | 2.5 | 6   | 74.5 |
| 970 | 5 | 14.5 | 2.5 | 6   | 72   |
| 971 | 5 | 17   | 2.5 | 6   | 69.5 |
| 972 | 5 | 19.5 | 2.5 | 6   | 67   |
| 973 | 5 | 7    | 5   | 3.5 | 79.5 |
| 974 | 5 | 9.5  | 5   | 3.5 | 77   |
| 975 | 5 | 12   | 5   | 3.5 | 74.5 |
| 976 | 5 | 14.5 | 5   | 3.5 | 72   |
| 977 | 5 | 17   | 5   | 3.5 | 69.5 |
| 978 | 5 | 19.5 | 5   | 3.5 | 67   |

|      |   |      |     |     |      |
|------|---|------|-----|-----|------|
| 979  | 5 | 7    | 5   | 4   | 79   |
| 980  | 5 | 9.5  | 5   | 4   | 76.5 |
| 981  | 5 | 12   | 5   | 4   | 74   |
| 982  | 5 | 14.5 | 5   | 4   | 71.5 |
| 983  | 5 | 17   | 5   | 4   | 69   |
| 984  | 5 | 19.5 | 5   | 4   | 66.5 |
| 985  | 5 | 7    | 5   | 4.5 | 78.5 |
| 986  | 5 | 9.5  | 5   | 4.5 | 76   |
| 987  | 5 | 12   | 5   | 4.5 | 73.5 |
| 988  | 5 | 14.5 | 5   | 4.5 | 71   |
| 989  | 5 | 17   | 5   | 4.5 | 68.5 |
| 990  | 5 | 19.5 | 5   | 4.5 | 66   |
| 991  | 5 | 7    | 5   | 5   | 78   |
| 992  | 5 | 9.5  | 5   | 5   | 75.5 |
| 993  | 5 | 12   | 5   | 5   | 73   |
| 994  | 5 | 14.5 | 5   | 5   | 70.5 |
| 995  | 5 | 17   | 5   | 5   | 68   |
| 996  | 5 | 19.5 | 5   | 5   | 65.5 |
| 997  | 5 | 7    | 5   | 5.5 | 77.5 |
| 998  | 5 | 9.5  | 5   | 5.5 | 75   |
| 999  | 5 | 12   | 5   | 5.5 | 72.5 |
| 1000 | 5 | 14.5 | 5   | 5.5 | 70   |
| 1001 | 5 | 17   | 5   | 5.5 | 67.5 |
| 1002 | 5 | 19.5 | 5   | 5.5 | 65   |
| 1003 | 5 | 7    | 5   | 6   | 77   |
| 1004 | 5 | 9.5  | 5   | 6   | 74.5 |
| 1005 | 5 | 12   | 5   | 6   | 72   |
| 1006 | 5 | 14.5 | 5   | 6   | 69.5 |
| 1007 | 5 | 17   | 5   | 6   | 67   |
| 1008 | 5 | 19.5 | 5   | 6   | 64.5 |
| 1009 | 5 | 7    | 7.5 | 3.5 | 77   |
| 1010 | 5 | 9.5  | 7.5 | 3.5 | 74.5 |
| 1011 | 5 | 12   | 7.5 | 3.5 | 72   |
| 1012 | 5 | 14.5 | 7.5 | 3.5 | 69.5 |
| 1013 | 5 | 17   | 7.5 | 3.5 | 67   |
| 1014 | 5 | 19.5 | 7.5 | 3.5 | 64.5 |
| 1015 | 5 | 7    | 7.5 | 4   | 76.5 |
| 1016 | 5 | 9.5  | 7.5 | 4   | 74   |
| 1017 | 5 | 12   | 7.5 | 4   | 71.5 |
| 1018 | 5 | 14.5 | 7.5 | 4   | 69   |
| 1019 | 5 | 17   | 7.5 | 4   | 66.5 |
| 1020 | 5 | 19.5 | 7.5 | 4   | 64   |
| 1021 | 5 | 7    | 7.5 | 4.5 | 76   |
| 1022 | 5 | 9.5  | 7.5 | 4.5 | 73.5 |

|      |   |      |     |     |      |
|------|---|------|-----|-----|------|
| 1023 | 5 | 12   | 7.5 | 4.5 | 71   |
| 1024 | 5 | 14.5 | 7.5 | 4.5 | 68.5 |
| 1025 | 5 | 17   | 7.5 | 4.5 | 66   |
| 1026 | 5 | 19.5 | 7.5 | 4.5 | 63.5 |
| 1027 | 5 | 7    | 7.5 | 5   | 75.5 |
| 1028 | 5 | 9.5  | 7.5 | 5   | 73   |
| 1029 | 5 | 12   | 7.5 | 5   | 70.5 |
| 1030 | 5 | 14.5 | 7.5 | 5   | 68   |
| 1031 | 5 | 17   | 7.5 | 5   | 65.5 |
| 1032 | 5 | 19.5 | 7.5 | 5   | 63   |
| 1033 | 5 | 7    | 7.5 | 5.5 | 75   |
| 1034 | 5 | 9.5  | 7.5 | 5.5 | 72.5 |
| 1035 | 5 | 12   | 7.5 | 5.5 | 70   |
| 1036 | 5 | 14.5 | 7.5 | 5.5 | 67.5 |
| 1037 | 5 | 17   | 7.5 | 5.5 | 65   |
| 1038 | 5 | 19.5 | 7.5 | 5.5 | 62.5 |
| 1039 | 5 | 7    | 7.5 | 6   | 74.5 |
| 1040 | 5 | 9.5  | 7.5 | 6   | 72   |
| 1041 | 5 | 12   | 7.5 | 6   | 69.5 |
| 1042 | 5 | 14.5 | 7.5 | 6   | 67   |
| 1043 | 5 | 17   | 7.5 | 6   | 64.5 |
| 1044 | 5 | 19.5 | 7.5 | 6   | 62   |
| 1045 | 5 | 7    | 10  | 3.5 | 74.5 |
| 1046 | 5 | 9.5  | 10  | 3.5 | 72   |
| 1047 | 5 | 12   | 10  | 3.5 | 69.5 |
| 1048 | 5 | 14.5 | 10  | 3.5 | 67   |
| 1049 | 5 | 17   | 10  | 3.5 | 64.5 |
| 1050 | 5 | 19.5 | 10  | 3.5 | 62   |
| 1051 | 5 | 7    | 10  | 4   | 74   |
| 1052 | 5 | 9.5  | 10  | 4   | 71.5 |
| 1053 | 5 | 12   | 10  | 4   | 69   |
| 1054 | 5 | 14.5 | 10  | 4   | 66.5 |
| 1055 | 5 | 17   | 10  | 4   | 64   |
| 1056 | 5 | 19.5 | 10  | 4   | 61.5 |
| 1057 | 5 | 7    | 10  | 4.5 | 73.5 |
| 1058 | 5 | 9.5  | 10  | 4.5 | 71   |
| 1059 | 5 | 12   | 10  | 4.5 | 68.5 |
| 1060 | 5 | 14.5 | 10  | 4.5 | 66   |
| 1061 | 5 | 17   | 10  | 4.5 | 63.5 |
| 1062 | 5 | 19.5 | 10  | 4.5 | 61   |
| 1063 | 5 | 7    | 10  | 5   | 73   |
| 1064 | 5 | 9.5  | 10  | 5   | 70.5 |
| 1065 | 5 | 12   | 10  | 5   | 68   |
| 1066 | 5 | 14.5 | 10  | 5   | 65.5 |

|      |   |      |    |     |      |
|------|---|------|----|-----|------|
| 1067 | 5 | 17   | 10 | 5   | 63   |
| 1068 | 5 | 19.5 | 10 | 5   | 60.5 |
| 1069 | 5 | 7    | 10 | 5.5 | 72.5 |
| 1070 | 5 | 9.5  | 10 | 5.5 | 70   |
| 1071 | 5 | 12   | 10 | 5.5 | 67.5 |
| 1072 | 5 | 14.5 | 10 | 5.5 | 65   |
| 1073 | 5 | 17   | 10 | 5.5 | 62.5 |
| 1074 | 5 | 19.5 | 10 | 5.5 | 60   |
| 1075 | 5 | 7    | 10 | 6   | 72   |
| 1076 | 5 | 9.5  | 10 | 6   | 69.5 |
| 1077 | 5 | 12   | 10 | 6   | 67   |
| 1078 | 5 | 14.5 | 10 | 6   | 64.5 |
| 1079 | 5 | 17   | 10 | 6   | 62   |
| 1080 | 5 | 19.5 | 10 | 6   | 59.5 |

---
